# Supplementary material
Source: HighWire-hosted journal article supplement (https://oem.bmj.com/content/75/1/52)
Supplement: inline-supplementary-material-1 [file inline-supplementary-material-1.pdf]

## Appendix B

**Table 5.** Baseline characteristics of participants in the initially unemployed sample (n=118).

|                                   | <b>PE</b>     | <b>ICBT</b>   | <b>TAU</b>    |
|-----------------------------------|---------------|---------------|---------------|
| <b>Participant characteristic</b> | <b>(n=40)</b> | <b>(n=38)</b> | <b>(n=40)</b> |
|                                   | <b>%</b>      | <b>%</b>      | <b>%</b>      |
| <b>Gender (% women)</b>           | 60.0          | 65.8          | 55.0          |
| <b>Age group</b>                  |               |               |               |
| 18-34                             | 30.0          | 18.4          | 27.5          |
| 35-49                             | 25.0          | 42.1          | 40.0          |
| 50-64                             | 45.0          | 39.5          | 32.5          |
| <b>Born in Sweden</b>             | 35.0          | 26.3          | 20.0          |
| <b>Main diagnosis (MINI)</b>      |               |               |               |
| Depression and anxiety            | 75.0          | 65.8          | 60.0          |
| Depression only                   | 10.0          | 7.9           | 15.0          |
| Anxiety only                      | 12.5          | 21.1          | 20.0          |
| Sub-threshold affective disorder  | 2.5           | 5.3           | 5.0           |
| <b>Education</b>                  |               |               |               |
| Primary school                    | 10.0          | 2.6           | 7.5           |
| Technical school                  | 17.5          | 13.2          | 7.5           |
| Secondary school (year 12)        | 35.0          | 18.4          | 35.0          |
| Post-secondary 2 years            | 7.5           | 28.9          | 22.5          |
| Tertiary                          | 30.0          | 36.8          | 27.5          |
| <b>Labour-market measure</b>      | 43.5          | 34.8          | 21.7          |

|                        |      |      |      |
|------------------------|------|------|------|
| <b>Antidepressants</b> | 40.5 | 28.6 | 28.9 |
|------------------------|------|------|------|

*Note.* PE=Physical Exercise, ICBT=Internet-based Cognitive Therapy, TAU=Treatment as Usual

**Table 6.** Baseline characteristics of participants in the initially employed sample (n=703).

|                                   | <b>PE</b>      | <b>ICBT</b>    | <b>TAU</b>     |
|-----------------------------------|----------------|----------------|----------------|
| <b>Participant characteristic</b> | <b>(n=240)</b> | <b>(n=233)</b> | <b>(n=230)</b> |
|                                   | <b>%</b>       | <b>%</b>       | <b>%</b>       |
| <b>Gender (% women)</b>           | 72.9           | 72.5           | 81.7           |
| <b>Age group</b>                  |                |                |                |
| 18-34                             | 35.0           | 32.2           | 29.6           |
| 35-49                             | 40.8           | 37.8           | 37.4           |
| 50-64                             | 24.2           | 30.0           | 33.0           |
| <b>Born in Sweden</b>             | 18.3           | 20.2           | 18.3           |
| <b>Main diagnosis (MINI)</b>      |                |                |                |
| Depression and anxiety            | 69.6           | 66.5           | 66.5           |
| Depression only                   | 7.9            | 7.7            | 8.3            |
| Anxiety only                      | 19.2           | 21.9           | 19.1           |
| Sub-threshold affective disorder  | 3.3            | 3.9            | 6.1            |
| <b>Education</b>                  |                |                |                |
| Primary school                    | 2.9            | 2.6            | 2.6            |
| Technical school                  | 11.3           | 12.0           | 11.4           |
| Secondary school (year 12)        | 25.9           | 21.0           | 23.6           |
| Post-secondary 2 years            | 17.2           | 17.6           | 19.2           |
| Tertiary                          | 42.7           | 46.8           | 43.2           |
| <b>Work status</b>                |                |                |                |
| Employed full time                | 75.4           | 76.0           | 82.2           |
| Employed part time                | 6.7            | 10.7           | 5.2            |

|                        |      |      |      |
|------------------------|------|------|------|
| Self-employed          | 8.7  | 9.9  | 7.4  |
| Studying               | 9.2  | 3.4  | 5.2  |
| <b>Antidepressants</b> | 29.0 | 30.3 | 21.7 |

*Note.* PE=Physical Exercise, ICBT=Internet-based Cognitive Therapy, TAU=Treatment as Usual
